# Supplementary material for: The application of statistical methodology to the analysis of time-resolved X-ray diffraction data
Source: Royal Society of Chemistry journal article supplement (doi:10.1039/c0ay00772b), 2011-01-01
Supplement: c0ay00772b.pdf [file c0ay00772b.pdf]

## **The application of statistical methodology to the analysis of time-resolved X-ray diffraction data: supporting information**

Jonathan C. Burley,<sup>a\*</sup> Dermot O'Hare,<sup>b</sup> and Gareth R. Williams<sup>b, c\*</sup>

<sup>a</sup> Laboratory of Biophysics and Surface Analysis, School of Pharmacy, Boots Science Building, University of Nottingham, University Park, Nottingham, NG7 2RD.

<sup>b</sup> Chemistry Research Laboratory, Department of Chemistry, University of Oxford, Mansfield Road, Oxford, OX1 3TA.

<sup>c</sup> School of Human Sciences, London Metropolitan University, 166-220 Holloway Road, London, N7 8DB.

\* authors for correspondence. Tel: +44 (0) 115 84 68357 (JCB) +44 207 133 2565 (GRW).  
Email: [jonathan.burley@nottingham.ac.uk](mailto:jonathan.burley@nottingham.ac.uk) (JCB); [g.williams@londonmet.ac.uk](mailto:g.williams@londonmet.ac.uk) (GRW).

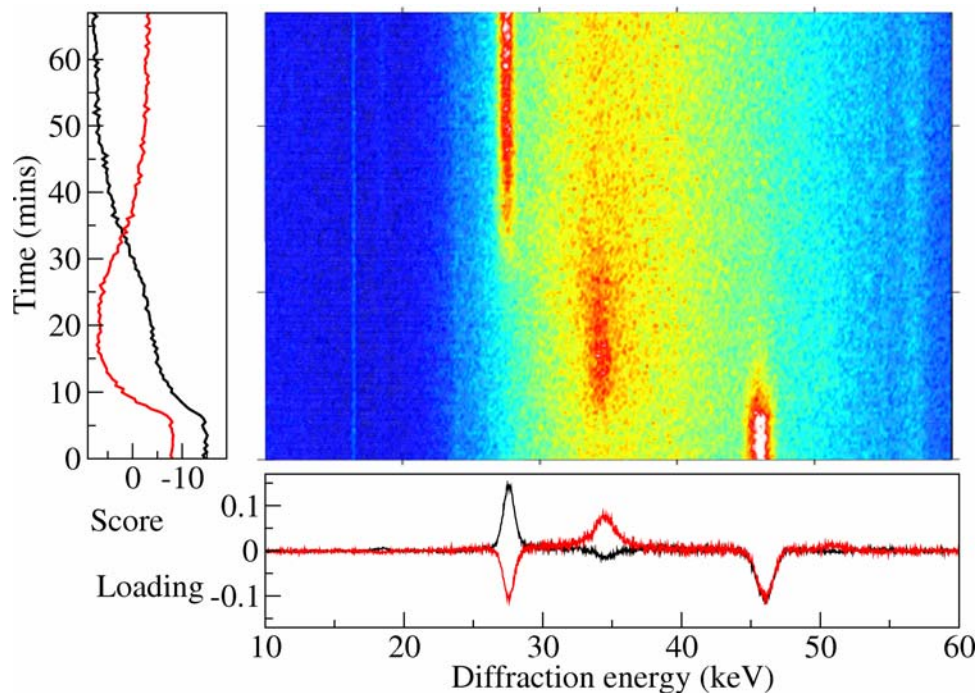

**Figure S1**

Variation of diffraction patterns (top right), PC1 and PC2 (top left) with time, and loadings (bottom) for the intercalation of MPA into h-LiAl<sub>2</sub>-Cl at pH 4. PC1 is in black, and PC2 in red. Raw data have been mean-centred and scaled by dividing the values of each (centred) pattern by the root mean square of the entire pattern.

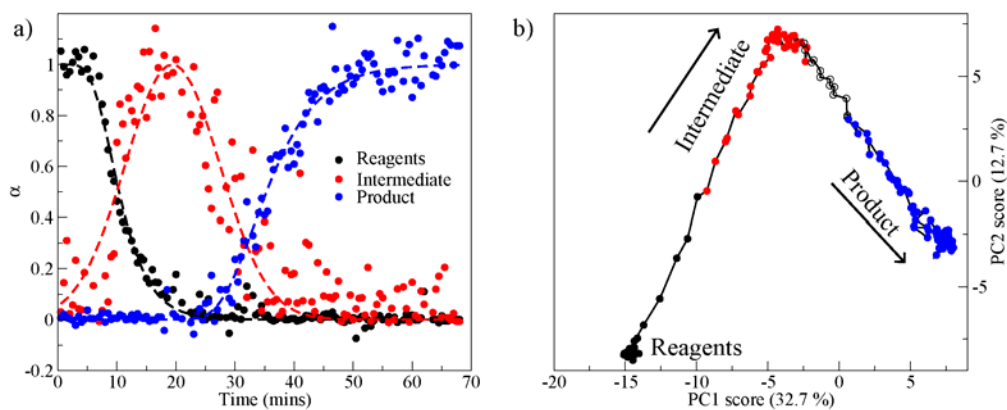

**Figure S2**

(a) Extent of reaction vs. time plot showing the change intensity of the host 002 reflection (●), intermediate 004 reflection (●) and the product 002 reflection (●) for the intercalation of MPA into h-LiAl<sub>2</sub>-Cl at pH 4. (b) The variation in the score of PC1 as a function of PC2. Data points are colour coded as in part (a), with full circles representing situations where  $\alpha > 0.5$  and empty circles situations where  $\alpha < 0.5$ .

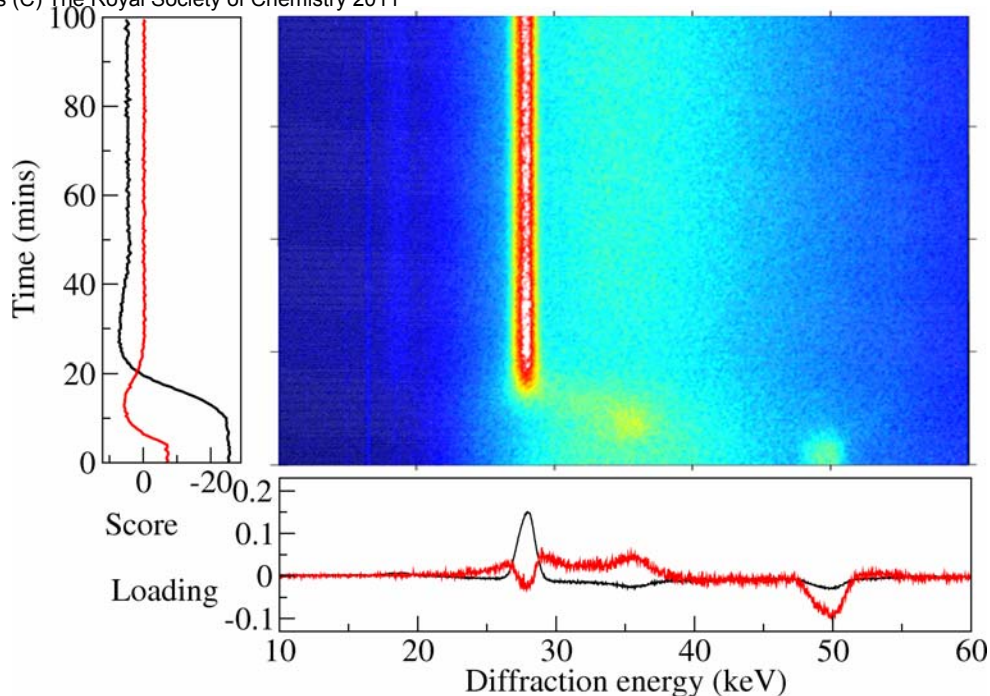

**Figure S3**

Variation of diffraction patterns (top right), PC1 and PC2 (top left) with time, and loadings (bottom) for the intercalation of EPA into h-LiAl<sub>2</sub>-Cl at pH 8. PC1 is in black, and PC2 in red. Raw data have been mean-centred and scaled by dividing the values of each (centred) pattern by the root mean square of the entire pattern.

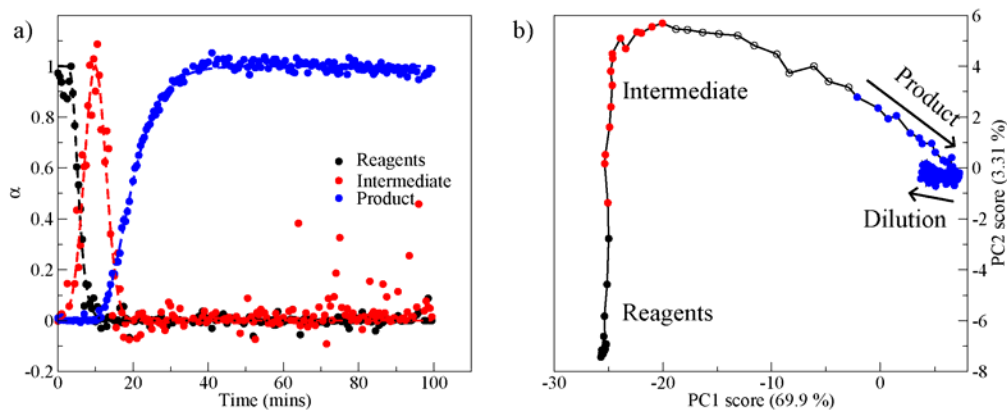

**Figure S4**

(a) Extent of reaction vs. time plot showing the change intensity of the host 002 reflection (●), intermediate 004 reflection (●) and the product 002 reflection (●) for the intercalation of EPA into h-LiAl<sub>2</sub>-Cl at pH 8. (b) The variation in the score of PC1 as a function of PC2. Data points are colour coded as in part (a), with full circles representing situations where  $\alpha > 0.5$  and empty circles situations where  $\alpha < 0.5$ .

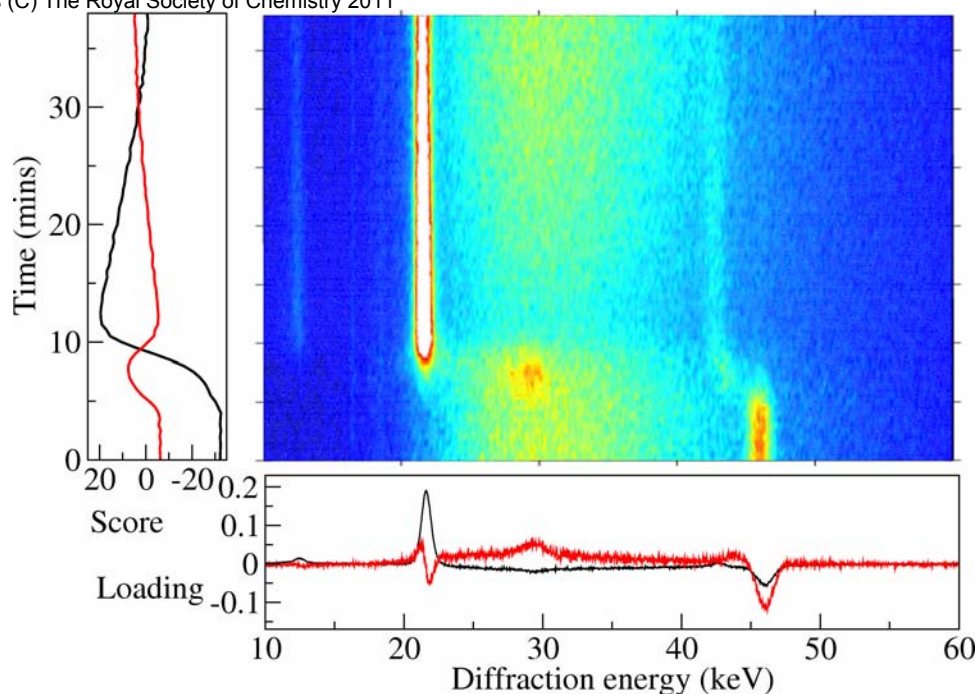

**Figure S5**

Variation of diffraction patterns (top right), PC1 and PC2 (top left) with time, and loadings (bottom) for the intercalation of BPA into h-LiAl<sub>2</sub>-Cl at pH 8. PC1 is in black, and PC2 in red. Raw data have been mean-centred and scaled by dividing the values of each (centred) pattern by the root mean square of the entire pattern.

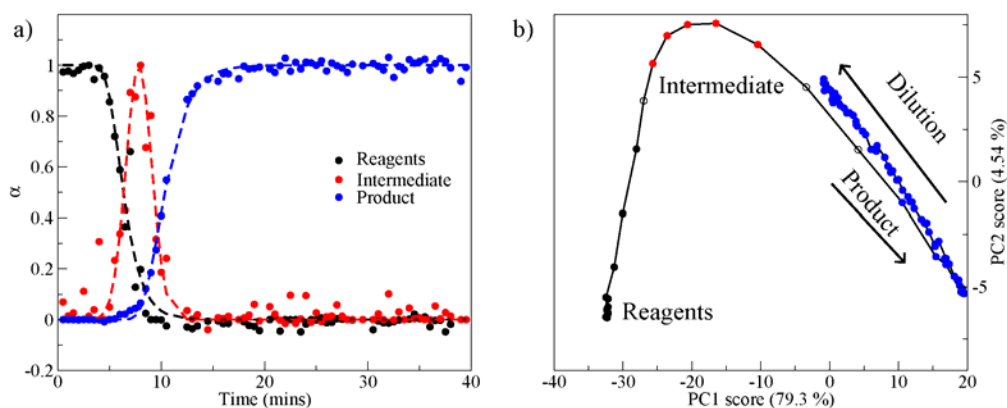

**Figure S6**

(a) Extent of reaction vs. time plot showing the change intensity of the host 002 reflection (●), intermediate 004 reflection (●) and the product 002 reflection (●) for the intercalation of BPA into h-LiAl<sub>2</sub>-Cl at pH 8. (b) The variation in the score of PC1 as a function of PC2. Data points are colour coded as in part (a), with full circles representing situations where  $\alpha > 0.5$  and empty circles situations where  $\alpha < 0.5$ .

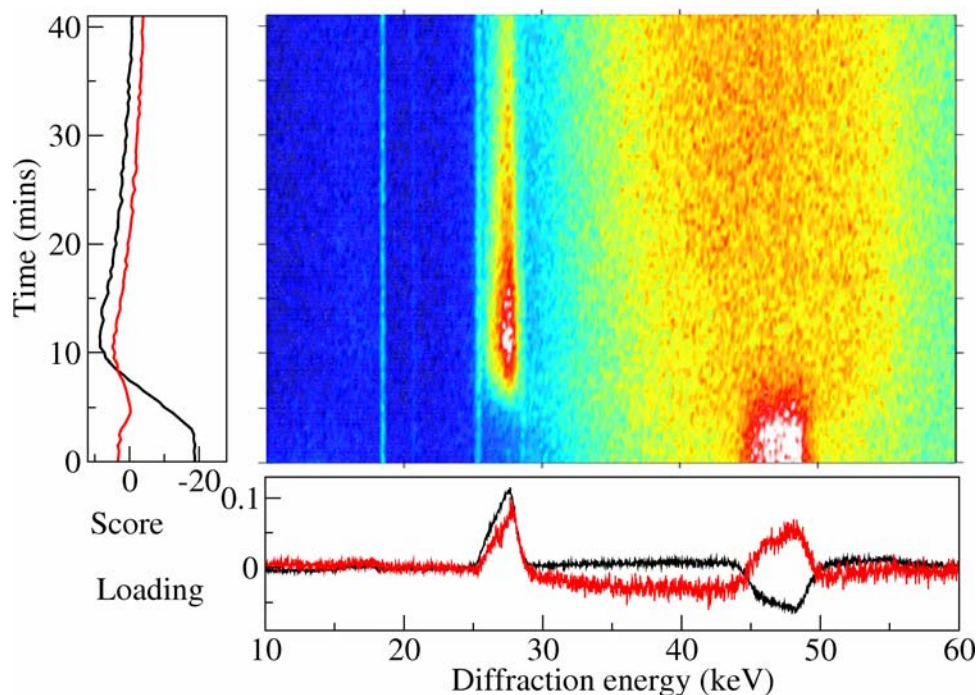

**Figure S7**

Variation of diffraction patterns (top right), PC1 and PC2 (top left) with time, and loadings (bottom) for the intercalation of PPA into h-LiAl<sub>2</sub>-NO<sub>3</sub> at pH 8. PC1 is in black, and PC2 in red. Raw data have been mean-centred and scaled by dividing the values of each (centred) pattern by the root mean square of the entire pattern.

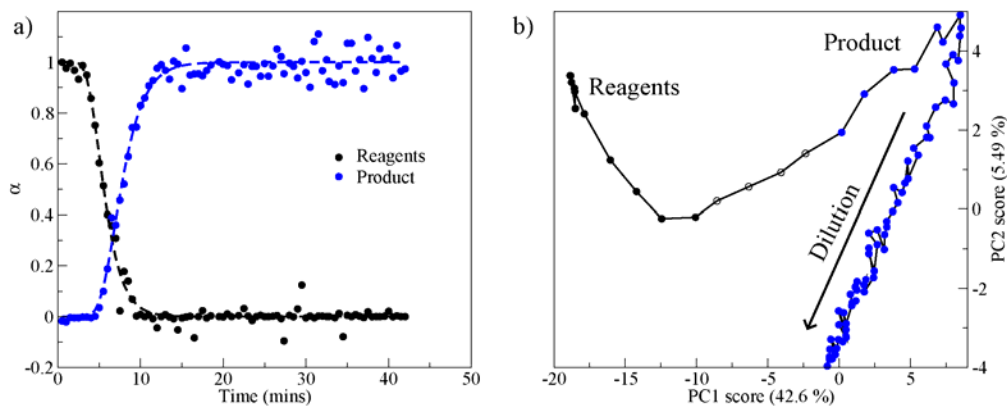

**Figure S8**

(a) Extent of reaction vs. time plot showing the change intensity of the host 002 reflection (●), and the product 002 reflection (●) for the intercalation of PPA into h-LiAl<sub>2</sub>-NO<sub>3</sub> at pH 8. (b) The variation in the score of PC1 as a function of PC2. Data points are colour coded as in part (a), with full circles representing situations where  $\alpha > 0.5$  and empty circles situations where  $\alpha < 0.5$ .



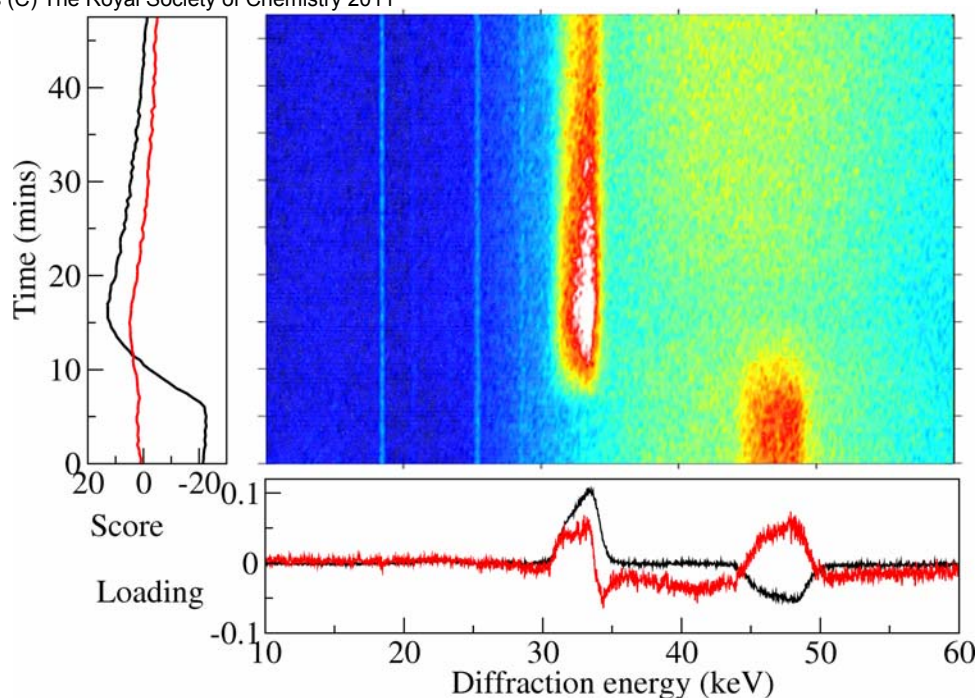

**Figure S9**

Variation of diffraction patterns (top right), PC1 and PC2 (top left) with time, and loadings (bottom) for the intercalation of MPA into  $h\text{-LiAl}_2\text{-NO}_3$  at pH 8. PC1 is in black, and PC2 in red. Raw data have been mean-centred and scaled by dividing the values of each (centred) pattern by the root mean square of the entire pattern.

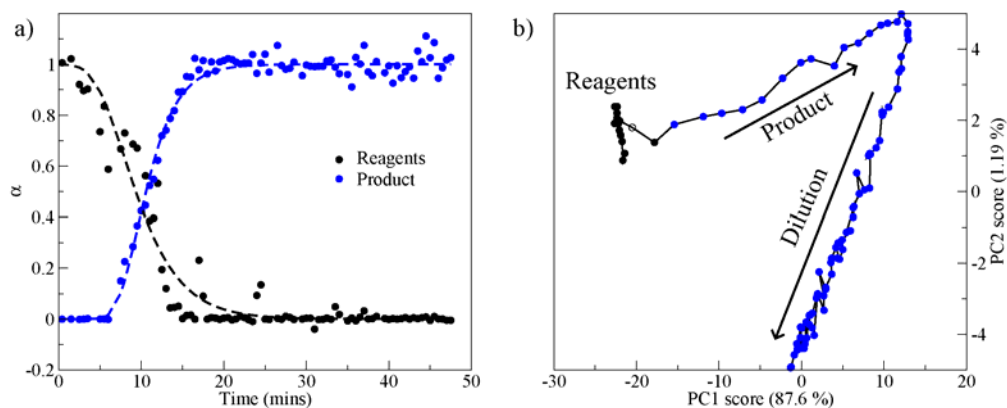

**Figure S10**

(a) Extent of reaction vs. time plot showing the change intensity of the host  $002$  reflection ( $\bullet$ ), and the product  $002$  reflection ( $\bullet$ ) for the intercalation of MPA into  $h\text{-LiAl}_2\text{-NO}_3$  at pH 8. (b) The variation in the score of PC1 as a function of PC2. Data points are colour coded as in part (a), with full circles representing situations where  $\alpha > 0.5$  and empty circles situations where  $\alpha < 0.5$ .

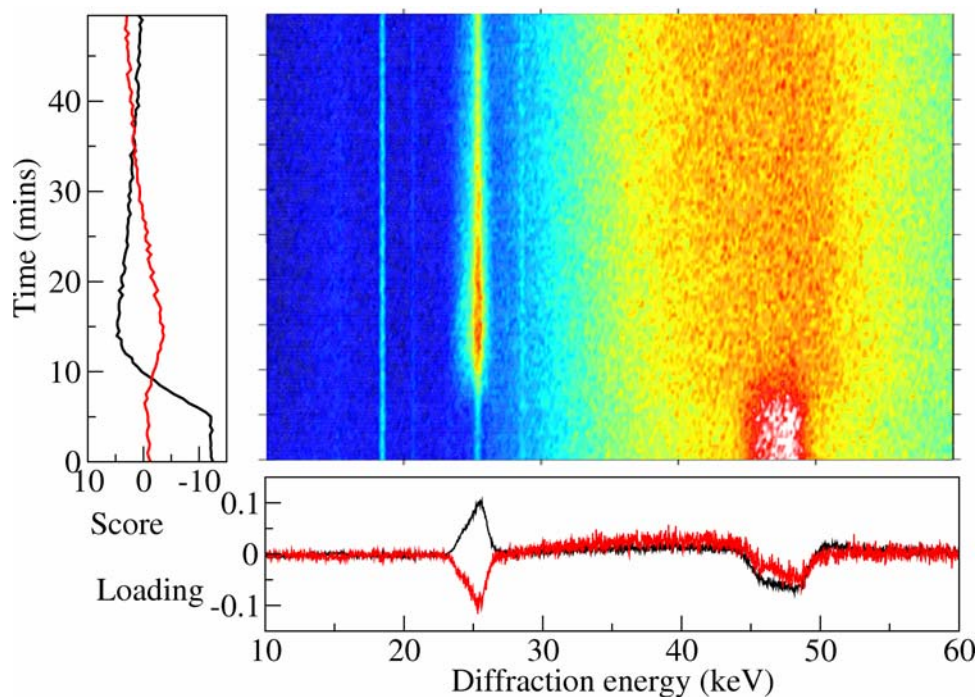

**Figure S11**

Variation of diffraction patterns (top right), PC1 and PC2 (top left) with time, and loadings (bottom) for the intercalation of EPA into h-LiAl<sub>2</sub>-NO<sub>3</sub> at pH 8. PC1 is in black, and PC2 in red. Raw data have been mean-centred and scaled by dividing the values of each (centred) pattern by the root mean square of the entire pattern.

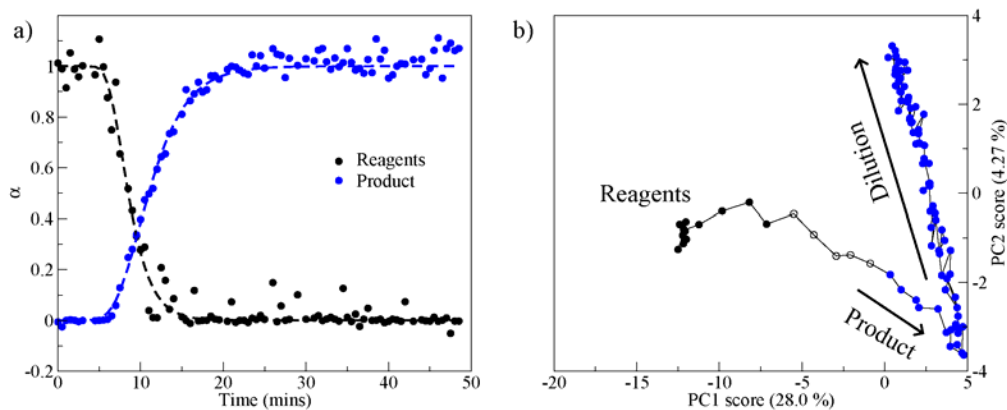

**Figure S12**

(a) Extent of reaction vs. time plot showing the change intensity of the host 002 reflection (●), and the product 002 reflection (●) for the intercalation of EPA into h-LiAl<sub>2</sub>-NO<sub>3</sub> at pH 8. (b) The variation in the score of PC1 as a function of PC2. Data points are colour coded as in part (a), with full circles representing situations where  $\alpha > 0.5$  and empty circles situations where  $\alpha < 0.5$ .

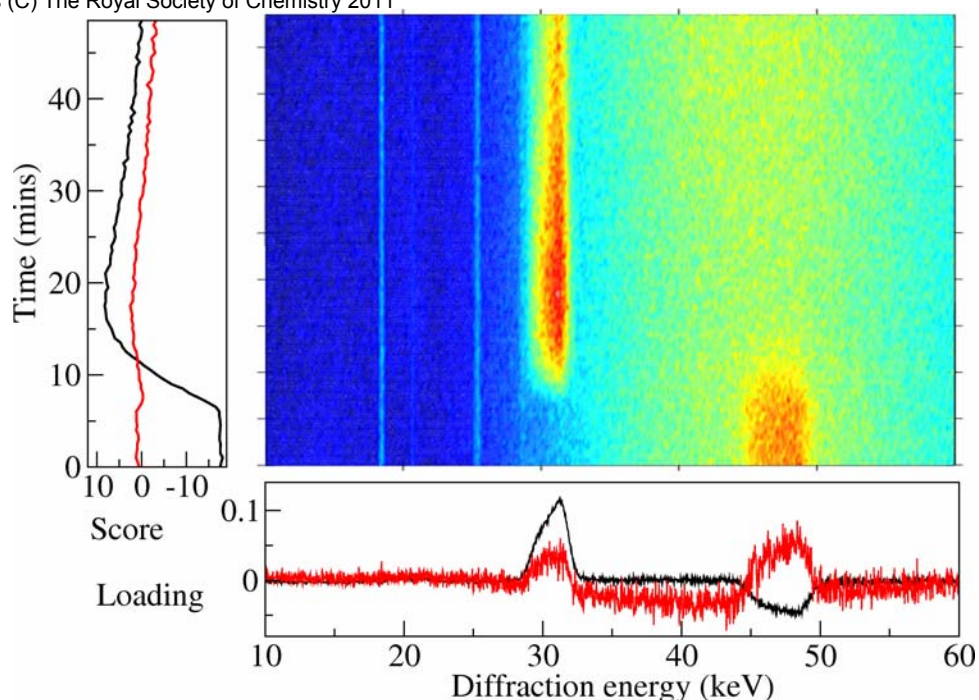

**Figure S13**

Variation of diffraction patterns (top right), PC1 and PC2 (top left) with time, and loadings (bottom) for the intercalation of BPA into  $h\text{-LiAl}_2\text{-NO}_3$  at pH 8. PC1 is in black, and PC2 in red. Raw data have been mean-centred and scaled by dividing the values of each (centred) pattern by the root mean square of the entire pattern.

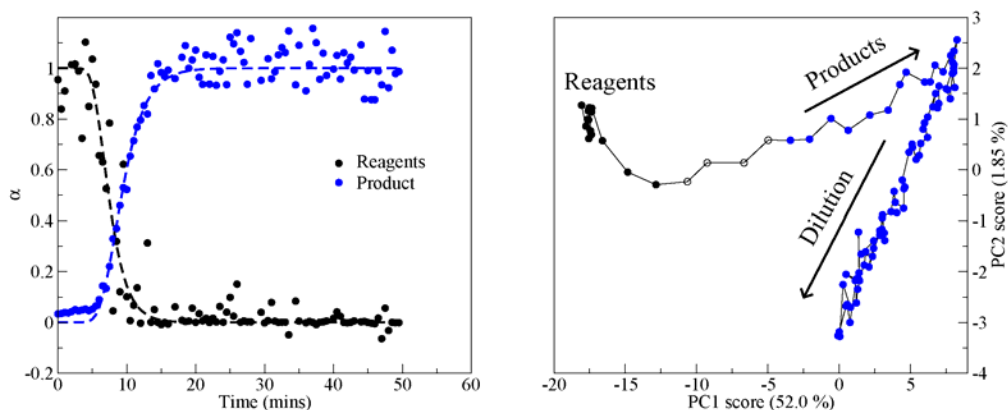

**Figure S14**

(a) Extent of reaction vs. time plot showing the change intensity of the host  $002$  reflection ( $\bullet$ ), and the product  $002$  reflection ( $\bullet$ ) for the intercalation of BPA into  $h\text{-LiAl}_2\text{-NO}_3$  at pH 8. (b) The variation in the score of PC1 as a function of PC2. Data points are colour coded as in part (a), with full circles representing situations where  $\alpha > 0.5$  and empty circles situations where  $\alpha < 0.5$ .
